# Supplementary material for: A new chicken 55K SNP genotyping array
Source: BMC Genomics. 2019 May 22;20:410. doi: 10.1186/s12864-019-5736-8 (PMC6532155; doi:10.1186/s12864-019-5736-8)
Supplement: Supplementary file 1 — The summary of each sequencing pools. The raw reads number, clean reads number, sequencing depth, Q30 percentage, and coverage et al. for each sequencing library were provided. (XLSX 14 kb) [file 12864_2019_5736_MOESM1_ESM.xlsx]

## Sheet: iascaas.chicken.poolseq.data.su
Sample	Beijing-You-1	Beijing-You-2	Beijing-You-3	Jingxing-huang-1	Jingxing-huang-2	Jingxing-huang-3	Sanhuang-1	Sanhuang-2	Sanhuang-3	Cyan shank partridge-1 (fast growth rate)	Cyan shank partridge-2 (fast growth rate)	Cyan shank partridge-3 (fast growth rate)	Cyan shank partridge-1 (mediate growth rate)	Cyan shank partridge-2 (mediate growth rate)	Cyan shank partridge-3 (mediate growth rate)	Cobb maternal-1	Cobb maternal-2	Cobb maternal-3	Cobb paternal line-1	Cobb paternal line-2	Cobb paternal line-3	Recessive White-1	Recessive White-2	Recessive White-3
Raw Reads Number	170711080	152123828	169161464	162475960	172584238	166472056	166685350	165232668	169113480	167184214	162286102	173281226	174124324	168051842	169245340	165234362	169725446	161637732	163897774	173456110	165303990	158104566	166552462	170769710
Raw Bases Number	21338885000	19015478500	21145183000	20309495000	21573029750	20809007000	20835668750	20654083500	21139185000	20898026750	20285762750	21660153250	21765540500	21006480250	21155667500	20654295250	21215680750	20204716500	20487221750	21682013750	20662998750	19763070750	20819057750	21346213750
Clean Reads Number	164643296	146180018	163774498	157805746	167504190	161269270	161746736	160536202	164709130	161858476	156882110	167505132	166650578	162222446	161735228	158494350	162563628	154986460	158806790	167863062	160230310	153251810	160494666	165646942
Clean Reads Rate(%)	96.45	96.09	96.82	97.13	97.06	96.87	97.04	97.16	97.4	96.81	96.67	96.67	95.71	96.53	95.56	95.92	95.78	95.89	96.89	96.78	96.93	96.93	96.36	97
Clean Bases Number	20580412000	18272502250	20471812250	19725718250	20938023750	20158658750	20218342000	20067025250	20588641250	20232309500	19610263750	20938141500	20831322250	20277805750	20216903500	19811793750	20320453500	19373307500	19850848750	20982882750	20028788750	19156476250	20061833250	20705867750
Low-quality Reads Number	5738800	5643006	5106546	4356484	4656306	4916712	4574992	4354348	4098594	4875610	5100288	5436720	6611612	5072156	7010890	6289988	6536874	6214768	4655430	5142338	4773560	4539010	5719468	4688202
Low-quality Reads Rate(%)	3.36	3.71	3.02	2.68	2.7	2.95	2.74	2.64	2.42	2.92	3.14	3.14	3.8	3.02	4.14	3.81	3.85	3.84	2.84	2.96	2.89	2.87	3.43	2.75
Adapter Contaminated Reads Number	328984	300804	280418	313730	423740	286072	363620	342118	305754	450126	303704	339372	858724	753338	495406	445780	620942	432202	435554	450708	300118	313746	338326	434564
Adapter Contaminated Reads Rate(%)	0.19	0.2	0.17	0.19	0.25	0.17	0.22	0.21	0.18	0.27	0.19	0.2	0.49	0.45	0.29	0.27	0.37	0.27	0.27	0.26	0.18	0.2	0.2	0.25
Raw Q30 Bases Rate(%)	87.81	87.35	88.53	89.35	89.54	89.04	89.82	90.06	90.83	89.27	88.94	89.14	86.41	87.04	86.38	85.74	85.94	84.68	89.05	88.62	88.57	89.47	88.8	89.76
Clean Q30 Bases Rate(%)	89.38	89.06	89.94	90.62	90.82	90.44	91.12	91.31	91.96	90.64	90.41	90.61	88.17	88.45	88.26	87.45	87.7	86.42	90.37	90.02	89.92	90.81	90.4	91.05
Ns Reads Number	0	0	0	0	0	0	0	0	0	0	0	0	3408	3900	3814	4244	4000	4302	0	0	0	0	0	0
Ns Reads Rate(%)	0	0	0	0	0	0	0	0	0	0	0	0	0	0	0	0	0	0	0	0	0	0	0	0
Genome Size galGal-4.0	1023114609	1023114609	1023114609	1023114609	1023114609	1023114609	1023114609	1023114609	1023114609	1023114609	1023114609	1023114609	1023114609	1023114609	1023114609	1023114609	1023114609	1023114609	1023114609	1023114609	1023114609	1023114609	1023114609	1023114609
Coverage	20.8568	18.5859	20.6675	19.8507	21.0856	20.3389	20.3649	20.1875	20.6616	20.4259	19.8275	21.1708	21.2738	20.5319	20.6777	20.1877	20.7364	19.7482	20.0244	21.1922	20.1962	19.3166	20.3487	20.864
